# Supplementary material for: Phase-controllable topochemical polymerization of liquid crystalline epoxy according to spacer length
Source: Royal Society of Chemistry journal article supplement (doi:10.1039/d2py01454h), 2022-12-23
Supplement: d2py01454h1.pdf [file d2py01454h1.pdf]

## Supplementary Material

# Phase-controllable topochemical polymerizations of liquid crystalline epoxy according to spacer length

*Kyosun Ku<sup>a</sup> and Hyeonuk Yeo<sup>\*b</sup>*

<sup>a</sup>Advanced Institute of Water Industry, <sup>b</sup> Department of Chemistry Education & Department of  
Pharmacy, Kyungpook National University, Daegu 41566, Republic of Korea.

\*Email: [yeo@knu.ac.kr](mailto:yeo@knu.ac.kr)

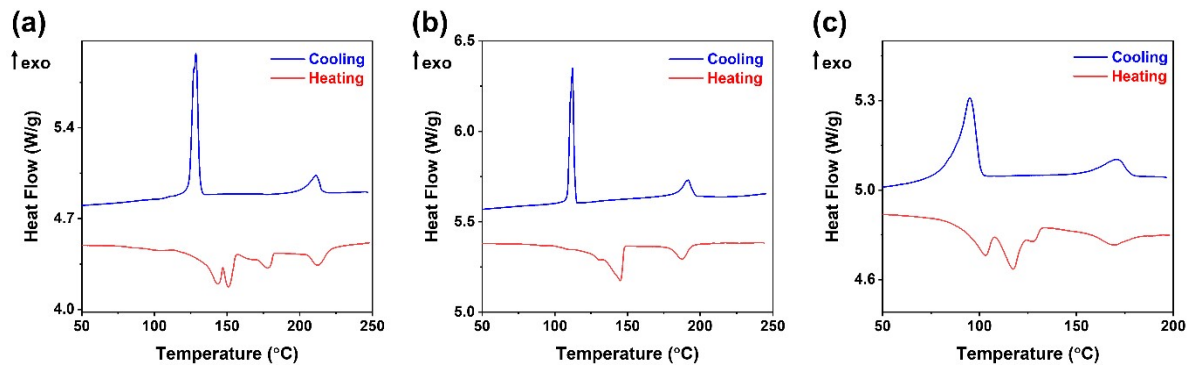

**Figure S1.** DSC curves of LCE<sub>n</sub> monomers at a heating and cooling rate of 5 °C/min: (a) LCE<sub>4</sub>, (b) LCE<sub>6</sub>, and (c) LCE<sub>8</sub>.

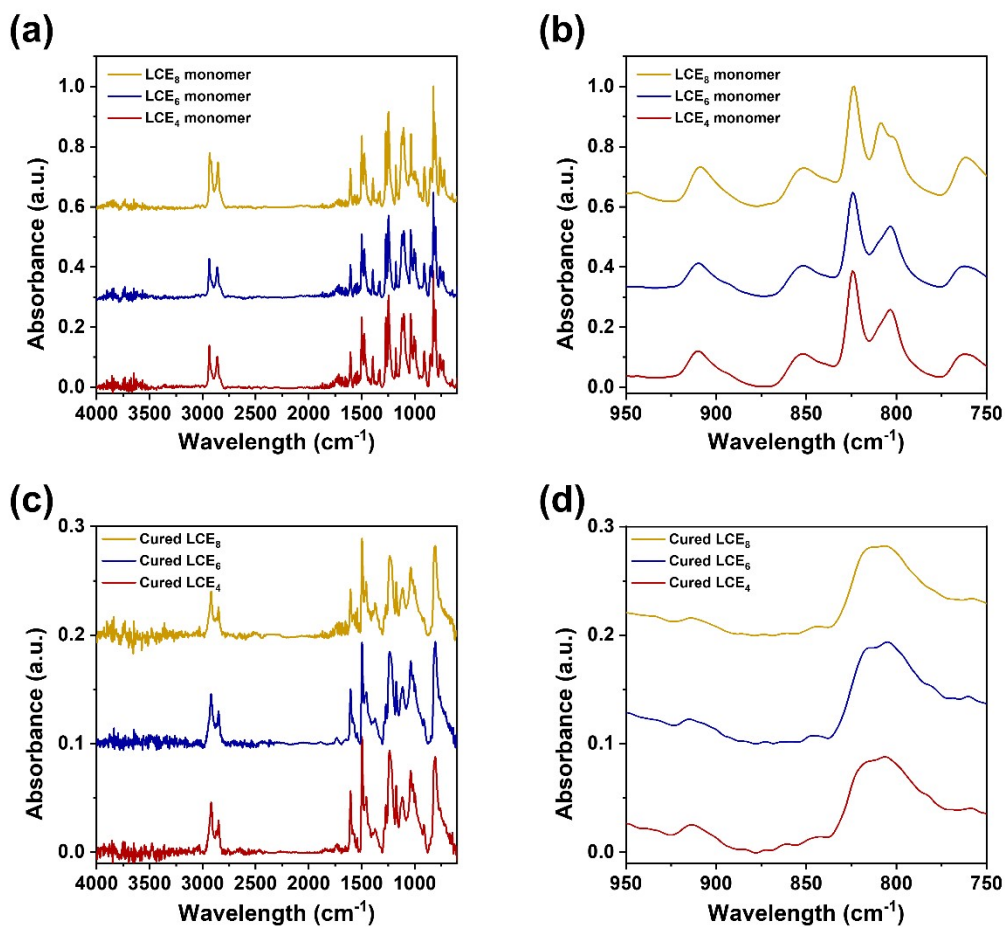

**Figure S2.** FT-IR spectra: (a,b) LCE<sub>n</sub> monomers, and (c,d) cured LCE<sub>n</sub>.
